# Supplementary material for: Chronic administration of P2X7 receptor antagonist JNJ-47965567 delays disease onset and progression, and improves motor performance in ALS SOD1G93A female mice
Source: Oxford University Press journal article supplement (doi:10.1242/dmm.045732), 2020-10-01
Supplement: dmm045732supp.pdf [file dmm045732supp.pdf]

## SUPPLEMENTARY INFORMATION

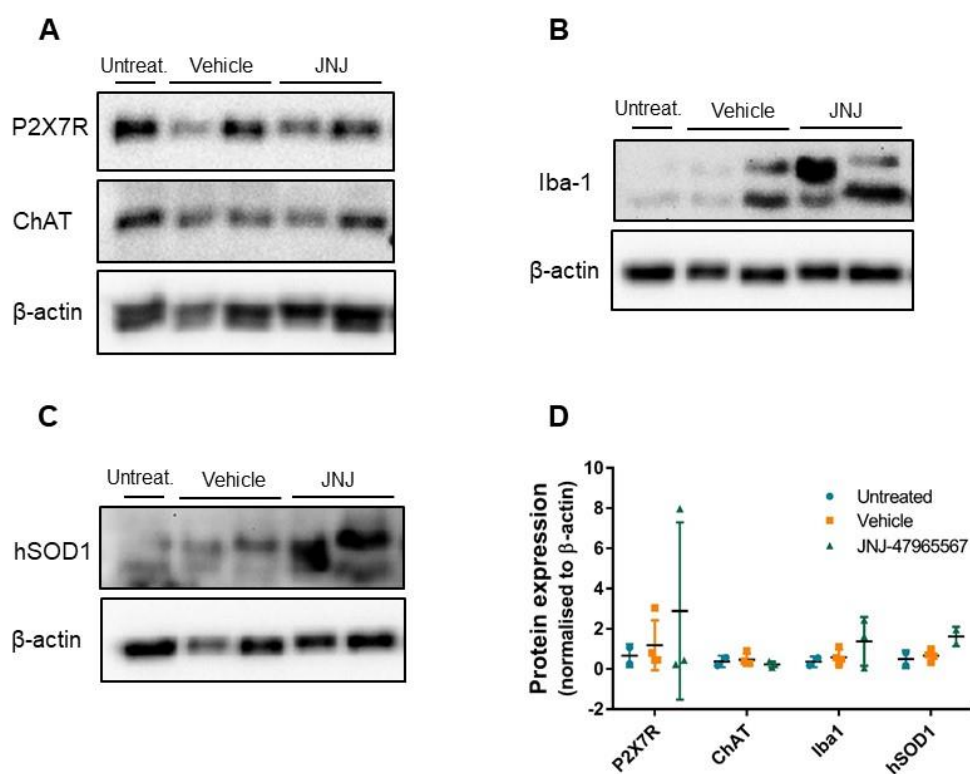

**Fig S1. Protein expression analysis of spinal cord homogenates extracted from end-point females using Western Blot.** Antibodies against P2X7R; choline acetyltransferase (ChAT), marker of motor neuron viability (**A**); Iba-1, marker of microglia (**B**); and mutated human SOD1 (**C**) were used. Results are presented in panel **D** as mean  $\pm$  SD. Data were analyzed with one-way ANOVA followed by Tukey's multiple comparisons test. Differences were considered as statistically significant when  $p < 0.05$ .
